# Supplementary material
Source: Springer Nature journal article supplement (https://www.springermedizin.de/resource/supplementary/12888_2011_1034_MOESM2_ESM.pdf/9479666)

PFC  
↑

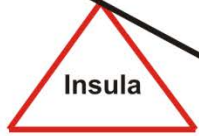

Mesolimbic  
↓

PFC  
↓

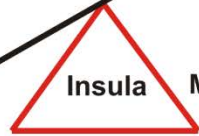

Mesolimbic  
↑

Supplement: MOESM2 [file 9479666]
